1 **An overexpressed *Q* allele leads to increased spike density and improved processing**  
2 **quality**

3

4 Bin-Jie Xu<sup>1</sup>, Qing Chen<sup>1</sup>, Ting Zheng<sup>1</sup>, Yun-Feng Jiang, Yuan-Yuan Qiao, Zhen-Ru Guo,  
5 Yong-Li Cao, Yan Wang, Ya-Zhou Zhang, Lu-Juan Zong, Jing Zhu, Cai-Hong Liu,  
6 Qian-Tao Jiang, Xiu-Jin Lan, Jian Ma, Ji-Rui Wang, You-Liang Zheng, Yu-Ming Wei\*,  
7 Peng-Fei Qi\*

8

9 Triticeae Research Institute, Sichuan Agricultural University, Chengdu, Sichuan 611130,  
10 China

11

12 <sup>1</sup> Contributed equally to this paper

13

14 **Keywords:** Bread-making quality, compact spike, point mutation, protein content, wheat  
15 breeding

16

17 \* Corresponding authors. P.-F. Qi, E-mail: pengfeiqi@hotmail.com; Y.-M. Wei, E-mail:

18 ymwei@sicau.edu.cn; Phone: +86-28-82650337; Fax +86-28-82650350

19

20 **Abstract**

21 Spike density and processing quality are important traits during the evolution of  
22 wheat, which is controlled by multiple gene loci. The associated gene loci have been  
23 heavily studied with slow progress. A common wheat mutant with extremely compact  
24 spikes and good processing quality was isolated. The gene ( $Q^{cl}$ ) responsible for the  
25 mutant phenotype was mapped and cloned, and the cellular mechanism for the mutant  
26 phenotype was investigated.  $Q^{cl}$  originated from a point mutation that interferes with the  
27 miR172-directed cleavage of the  $Q$  gene, leading to its overexpression.  $Q^{cl}$  reduces the  
28 longitudinal cell size of rachises, resulting in an increased spike density.  $Q^{cl}$  increases the  
29 number of vascular bundles, which suggests a higher efficiency in the transportation of  
30 assimilates in the spikes of the mutant than in the WT. This could account for the  
31 improved processing quality. The effects of  $Q^{cl}$  on spike density and wheat processing  
32 quality were confirmed by the identification of nine common wheat mutants having four  
33 different  $Q^c$  alleles. These results deepen our understanding of the key role of  $Q$  gene, one  
34 of the most important domestication gene for wheat, and provide new insights for the  
35 potential application of  $Q^c$  allele in wheat breeding.

## 36 **Introduction**

37 The spike density of wheat is an important characteristic, which is controlled by  
38 multiple gene loci. The expression of the *Compactum* (*C*) locus on the 2D chromosome  
39 of *Triticum aestivum* ssp. *compactum* (Host) Mac Key (club wheat) results in an  
40 increased spike density (compact spikes; Dvorak *et al.*, 1998; Johnson *et al.*, 2008). The  
41 *Soft outer glume* (*Sog*) gene located on chromosome 2A<sup>m</sup> of *Triticum monococcum* (Sood  
42 *et al.*, 2009) and the *zeocriton* (*Zeo*) gene on the 2H chromosome of barley (Druka *et al.*,  
43 2011) can lead to compact spikes as well, and they may be orthologous to *C*. The *Q* gene  
44 located on the long arm of chromosome 5A (5AL) affected spike density (Simons *et al.*,  
45 2006). Four gene loci (*C*<sup>739</sup>, *C*<sup>17648</sup>, *Cp*<sup>m</sup> and *Cp*) controlling compact spikes have been  
46 mapped on 5AL (Mitrofanova, 1997; Laikova *et al.*, 2009; Kosuge *et al.*, 2008, 2012).  
47 However, due to the complexity of wheat genome, none of these genes were cloned.

48 Here, a common wheat mutant (*S-CpI-1*) with extremely compact spikes was isolated,  
49 and the gene responsible for the mutant phenotype was mapped and cloned. A missense  
50 mutation in the 10th exon of *Q* reduced its repression by miR172, and this new allele of  
51 *Q* gene, *Q*<sup>cl</sup>, dramatically improved the wheat processing quality. The relationship  
52 between *Q*<sup>c</sup> alleles (*Q*<sup>cl</sup>-*Q*<sup>c4</sup>) and the observed phenotype was confirmed by the  
53 identification of nine additional mutants. Our results provide new insights for the  
54 potential application of *Q*<sup>c</sup> alleles in wheat breeding.

55

## 56 **Materials and Methods**

### 57 **Wheat materials and growth conditions**

58 The *S-Cp1-1* mutant with compact spikes was isolated from 0.6% EMS-treated  
59 common wheat (*Triticum aestivum* L.) cultivar ‘Shumai482’. The WT (*QQ*),  
60 heterozygous (*QQ<sup>cl</sup>*) and mutant (*Q<sup>cl</sup>Q<sup>cl</sup>*) lines used in this study were derived from an  
61 M<sub>6</sub> heterozygous plant. The nine mutants (Supporting information Table S1) were  
62 isolated from 0.8% EMS-treated common wheat cultivars ‘Shumai482’, ‘Liangmai4’,  
63 ‘Mianmai37’ and ‘Roblin’. To map the *cp1* locus and evaluate the effect of *cp1* on the  
64 grain protein content (dry weight), we generated two populations from the crosses of  
65 *S-Cp1-1* × br220 (a hexaploid wheat line) and *S-Cp1-1* × wanke421 (a common wheat  
66 cultivar). The mapping population was grown on the experimental farm of Sichuan  
67 Agricultural University in Wenjiang, with a row space of 20 cm × 10 cm. To analyze the  
68 processing qualities of WT (*QQ*), heterozygous (*QQ<sup>c</sup>*) and mutant (*Q<sup>c</sup>Q<sup>c</sup>*) lines, the field  
69 experiments were performed in a randomized block design with three replicates for each  
70 line. Each replicate was planted with an area of 2 m × 4 m, with a row space of 20 cm ×  
71 5 cm. A nitrogen : phosphorous : potassium (15 : 15 : 15; 450 kg per hectare) compound  
72 fertilizer was used before sowing.

### 73 **Morphological analysis**

74 All of the phenotypic data were analyzed by  $X^2$  tests (SPSS 22). The developing  
75 spikes of *S-Cp1-1* and WT were scanned using an optical microscope (Olympus, Japan)  
76 and EPSON perfection V700 (EPSON, Japan). The spikes at the heading stages were  
77 fixed in FAA (70% alcohol : 37% formaldehyde : acetic acid = 18 : 1 : 1, v : v : v) and  
78 embedded in paraffin. Then, the paraffin wax was cut into 6- $\mu$ m sections using a Leica  
79 slicer (Leica, Inc., Germany). Safranin O/ fast green (Solarbio) was used for staining. The  
80 splices were photographed using a BX60 light microscope (Olympus, Japan).

## 81 **Map-based cloning**

82 Genomic DNA extracted from the young leaves of 260 F<sub>2</sub> plants, derived from  
83 *S-Cp1-1* × br220, was divided into 24 mixed DNA pools based on their spike phenotypes.  
84 The mixed DNA samples were analyzed by Illumina 90K SNP microarray at Compass  
85 Biotechnology (Beijing, China), primarily to locate the *cp1* locus. Then, the *cp1* locus  
86 was mapped by SSR and STS markers in an F<sub>2</sub> population of 819 plants. More molecular  
87 markers were developed (Supporting information Table S2) to narrow the candidate  
88 region using 10,100 F<sub>3</sub> plants derived from heterozygous F<sub>2</sub> plants. The BACs and  
89 scaffolds were queried using a BLAST algorithm in NCBI (<http://www.ncbi.nlm.nih.gov/>)  
90 and aligned based on their relative positions and overlap. All of the BACs and scaffolds  
91 used are listed in Supporting information Table S3.

92 The cDNA and genomic DNA sequences of candidate genes were amplified from  
93 both mutant and WT plants, and confirmed by sequencing (Invitrogen, Shanghai, China).  
94 Sequences were analyzed by DNAMAN V6 (Lynnon Biosoft Inc., USA). The promoter  
95 of the *Q* gene was amplified with primer pair AP5P.16F + AP5P.12R (Simons *et al.*, 2006)  
96 and sequenced.

## 97 **Sequence-capture**

98 The qualified genomic DNA sample, extracted by a DNA extraction kit (TIANGEN,  
99 Beijing, China), was randomly fragmented. The base-pair peak of the DNA fragments  
100 was 200 to 300 bp. Adapters were ligated to both ends of the resulting fragments. DNA  
101 was then amplified by ligation-mediated PCR (LM-PCR), purified, and hybridized to the  
102 Roche NimbleGen SeqCap EZ Exome probe (BGI, China). Non-hybridized fragments  
103 were washed out. Both non-captured and captured LM-PCR products were subjected to

104 quantitative PCR to estimate the magnitude of the enrichment. Each captured library was  
105 loaded on a Hiseq4000 platform. We performed high-throughput sequencing for each  
106 captured library independently to ensure that each sample met the desired average  
107 fold-coverage. Raw image files were processed by Illumina using base calling with  
108 default parameters and the sequences of each individual were generated as 100-bp reads.  
109 The bioinformatics of sequences were analyzed using BWA  
110 (<http://bio-bwa.sourceforge.net/>) and SAMtools (<http://samtools.sourceforge.net/>).  
111 SOApsnp (<http://soap.genomics.org.cn/soapsnp.html>) and SAMtools pileup were used to  
112 detect SNPs and InDels, respectively.

### 113 **Quantitative RT-PCR analysis**

114 The young spikes of the *S-CpI-1* mutant and WT lines were collected at three  
115 different stages, the pistil and stamen initiation stage, the anther formation stage and the  
116 elongation stage. Root, stem and leaf samples of *S-CpI-1* and WT at the pistil and stamen  
117 initiation stage were collected as well. Samples were ground in liquid nitrogen, and RNA  
118 was extracted using the Plant RNA extraction kit V1.5 (Biofit, China). Quantitative  
119 RT-PCRs were performed using a SYBR premix Ex Taq<sup>™</sup> RT-PCR kit (Takara, Dalian,  
120 China). All of the experiments were performed following the manufacturer's instructions.  
121 The primers for qRT-PCR are listed in Supporting information Table S2.

### 122 **5' modified RACE**

123 The 5' modified RACE was performed as reported previously (Llave *et al.*, 2002).  
124 Total RNA was isolated from spikes of the mutant and WT at the pistil initiation stage  
125 using a Plant RNA extraction kit V1.5 (Biofit). The primers for the first and second PCR  
126 products were Q-cDNA-R and 3'RACE-R (Supporting information Table S2),

127 respectively. The second PCR products were purified and cloned into the pMD19-T  
128 vector (Takara, Dalian, China) for sequencing.

### 129 **SDS-PAGE analysis**

130 Seed storage proteins were extracted from 20 mg seed powder and separated by  
131 sodium dodecyl sulfate-polyacrylamide gel electrophoresis (SDS-PAGE) as described by  
132 Qi *et al.* (2011).

### 133 **Quantification of proteins by iTRAQ and mass spectrophotometry**

134 The spikes of the mutant and WT at the pistil and stamen initiation stage were  
135 collected and ground into powder in liquid nitrogen. The tissue powders were mixed with  
136 200  $\mu$ L extraction buffer (30 mM Tris-HCl, 2 M thiourea, 7 M urea, 4%  
137 3-[(3-Cholamidopropyl) dimethylammonio] propanesulfonate and 1 mM PMSP inhibitor;  
138 pH = 8.5) for 30 min to extract proteins. The total proteins were analyzed by iTRAQ. The  
139 molecular weight of the Q<sup>e1</sup> protein was predicted, and the targeted protein bands in  
140 SDS-PAGE were excised from the gel and analyzed by mass spectrophotometry. The  
141 BIOWORKS software was used to query, using the BLAST algorithm, the relative  
142 proteins in NCBI (Ji *et al.*, 2010). The iTRAQ testing and mass spectrophotometry were  
143 conducted at the Beijing Proteome Research Center (Beijing, China).

### 144 **Processing quality analysis**

145 Grain samples were cleaned and adjusted to 14% moisture, before being milled with a  
146 Brabender Quandrumat Junior mill (Brabender GmbH & Co. KG, Germany). The grain  
147 protein content (dry weight), zeleny sedimentation value and wet gluten content were  
148 measured following GB/T 17320-2013, using an automatic azotometer (Kjelec 8400;

149 FOSS, Denmark), a zeleny analysis system (CAU-B, China) and a glutomatic 2200  
150 system (Perten, Sweden), respectively.

151 Dough rheological properties were determined with a 10-g Mixograph (TMCO,  
152 Lincoln, USA). Samples were mixed to optimum water absorption following the 54-40A  
153 method (AACC, 2001). The development time (min to the curve's peak) was measured.  
154 Finally, results were collected and analyzed using MixSmart software.

155 The baking test was performed according to AACC method 10.09-01 (AACC, 2010)  
156 with some modifications. The baking procedure was the standard rapid-mix-test with 135  
157 g flour at 14% moisture content, and two replicates for each flour sample were  
158 performed.

159

## 160 **Results**

### 161 ***S-Cp1-1* mutant displays a pleiotropic phenotype**

162 A mutant line with spikes as compact as *T. compactum* was isolated from ethyl  
163 mesylate (EMS)-treated *T. aestivum* cv. 'Shumai482', which also shows dwarf  
164 characteristics (height) when compared with the wild type (WT). This mutant was named  
165 *S-Cp1-1* (the first *Cp* mutant of 'Shumai482'). The *S-Cp1-1* line had a similar  
166 architecture to WT before the tillering stage (Figure 1A). However, by the jointing stage, its  
167 plant heights and spike densities were significantly different from those of WT (Figure  
168 1B–1E). A microscopic comparison of the transverse rachises sections revealed that the  
169 cells of *S-Cp1-1* were significantly reduced in size and increased in number, and the  
170 number of vascular bundles in *S-Cp1-1* was increased (Figure 2A and 2B). Additionally,  
171 the vascular morphology was changed in *S-Cp1-1* (Figure 2A). There were lower



172 numbers of xylem cells in the vascular bundles and greater numbers of cells around the  
173 vessels (Figure 2A and 2E) when compared with in the WT (Figure 2B and 2F).  
174 Longitudinal sections of rachises indicated that the cells in *S-Cp1-1* decreased in size  
175 (Figure 2C) compared with in WT (Figure 2D). Backcrossing *S-Cp1-1* with ‘Shumai482’  
176 indicated that the compact spike and dwarf height phenotypes did not segregate in the  
177 BC<sub>1</sub>F<sub>2</sub> population, hiding the fact that these phenotypes in *S-Cp1-1* were controlled by a  
178 single locus. We named the locus *compact 1* (*cp1*).

### 179 ***Q<sup>cl</sup>* is the candidate gene in the *cp1* locus**

180 A genetic analysis showed that *cp1* was semi-dominant (Supporting information,  
181 Figure S1). Compact spikes were selected as the trait for mapping *cp1*. *cp1* was first  
182 positioned on 5AL (Supporting information Figure S2) using a wheat 90 K  
183 single-nucleotide polymorphism (SNP) microarray and 24 DNA pools of F<sub>2</sub> plants  
184 generated from the cross of *S-Cp1-1* and a hexaploid wheat line br220. Furthermore,  
185 sequence-tagged site (STS) and simple sequence repeat (SSR) markers (Supporting  
186 information Table S2) were developed to place *cp1* in a 1.6-cM region between markers  
187 *qs2* and *qs3* with 0.4 cM and 1.2 cM, respectively, based on the physical map draft (Ling  
188 *et al.*, 2013; <http://plants.ensemble.org>;  
189 <http://www.gramene.org/gremene/searches/ssrtool>). More markers were developed to  
190 narrow this region, based on the bacterial artificial chromosomes (BACs) and scaffolds in  
191 this region (Supporting information Table S3). An STS marker, *qs1*, was identified as  
192 co-segregating with *cp1* in 10,100 F<sub>3</sub> individuals, which were derived from heterozygous  
193 F<sub>2</sub> plants of *S-Cp1-1* × br220. Sequence-capture was performed to sequence the  
194 chromosomal region of the WT and *S-Cp1-1* that corresponded to where molecular

195 marker *qs1* was located (GenBank Nos. JF701619 and JF701620, respectively), to  
196 identify the possible mutation within this region. A missense mutation (C-T) in the 10th  
197 exon of the *Q* gene was found, which was confirmed by gene cloning and sequencing  
198 (Genbank Nos. KX580301 and KX580302). This point mutation led to the substitution of  
199 serine by leucine (Supporting information Fig. S3). Then, we named the *Q* gene  
200 containing this point mutation as *Q<sup>cl</sup>* (the first *Q* with compact spikes).

### 201 **Expressional analyses of *Q<sup>cl</sup>***

202 To determine why *Q<sup>cl</sup>* had an increased spike density, we compared the expression  
203 levels of *Q<sup>cl</sup>* and *Q* by qRT-PCR. During spike development, the transcription level of  
204 *Q<sup>cl</sup>* was higher than that of *Q* before the anther elongation stage (Figure 3D-3F), and the  
205 largest difference was observed at the early spikelet differentiation stages (pistil and  
206 stamen initiation stage; Figure 3B-3F). These data indicated that the increased spike  
207 density (reduced rachis internodes) in *S-Cp1-1* was a consequence of the higher  
208 expression of *Q<sup>cl</sup>* than *Q* (Figure 3A-3D). In addition to differences in spikes, *Q<sup>cl</sup>* and *Q*  
209 expressed differentially at the RNA level in roots, stems and leaves, as well as at the pistil  
210 and stamen initiation stage. Relative to *Q*, the expression level of *Q<sup>cl</sup>* was much higher in  
211 spikes and stems, which was consistent with the phenotypic changes in spike density and  
212 plant height (Figure 1B and 1E; Figure 3E).

213 Previous studies demonstrated that *Q* was an AP<sub>2</sub> transcription factor member,  
214 containing two AP<sub>2</sub> DNA-binding domains and a miR172-binding site in the 10th exon  
215 (Simons *et al.*, 2006). The *Q<sup>cl</sup>* point mutation was in the miR172-binding site (Figure 4A).  
216 To confirm whether the higher expression level of *Q<sup>cl</sup>* was due to the altered cleavage by  
217 miR172, a 5' rapid amplification of cDNA end (RACE) analysis was performed. The

218 sequencing of 20 randomly chosen  $Q^{c1}$  and  $Q$  clones showed that the cleavage site in the  
219 miR172-binding region was changed, resulting in a reduced cleavage efficiency of the  
220 miR172 target site. Thus, the point mutation in  $Q^{c1}$  disturbed the *in vivo* cleavage by  
221 miR172 (Figure 4B).

### 222 **Point mutations in the miR172-binding site of $Q$ contributed to the increased spike** 223 **density**

224 To further confirm the effects of point mutations in the miR172-binding site of the  $Q$   
225 gene on spike density, common wheat cultivars ‘Shumai482’, ‘Mianmai37’, ‘Liangmai4’  
226 and ‘Roblin’ were treated by EMS again. We obtained, by sequencing, nine independent  
227 mutants with four different point mutations in the miR172-binding site of  $Q$  (Figure 5B;  
228 Supporting information Table S1). The spike densities of these nine mutants were similar  
229 to that of  $S-Cp1-1$  (Figure 5A).

### 230 **$Q^c$ alleles improve the wheat processing quality**

231 The increased number of vascular bundles in  $S-Cp1-1$  (Figure 2) suggested a higher  
232 transportation efficiency of assimilates in the spikes of mutants than in those of WT,  
233 which motivated us to compare the processing qualities of  $S-Cp1-1$  and WT. Dramatic  
234 differences were found when comparing the processing parameters of the  $S-Cp1-1$  mutant,  
235 heterozygote and WT lines (Table 1), and the loaf volume of the mutant line was much  
236 greater than that of the WT (Supporting information Figure S4). Notably, no variations in  
237 seed storage proteins were observed (Supporting information Figure S5), especially the  
238 high molecular weight glutenin subunits, which are among the most important  
239 determinants in bread-making (Shewry *et al.*, 2003). To demonstrate that the  
240 improvement in the wheat processing quality was due to the presence of  $Q^{c1}$ , the grain

241 protein contents (dry weight) of two F<sub>2</sub> populations were measured. As expected, the  
242 grain protein contents of plants with two copies of the *Q<sup>cl</sup>* gene were much higher than  
243 those with one or no *Q<sup>cl</sup>* copies (Figure 6). The positive effect of *Q<sup>c</sup>* alleles on the  
244 processing quality was supported by comparing the grain protein contents of mutants  
245 having different *Q<sup>c</sup>* alleles to the WT (Supporting information Table S1).

246

## 247 **Discussion**

248 Numerous studies have explored the genes determining and affecting spike density in  
249 wheat. It was believed that the dominant allele of the *C* gene determined the compact  
250 spike phenotype of club wheat, which was located on chromosome 2D (Johnson *et al.*,  
251 2008). However, research on four compact determining genes (*C<sup>17648</sup>*, *C<sup>739</sup>*, *C<sub>p</sub>* and *C<sub>p<sup>m</sup></sub>*)  
252 from wheat mutants indicated that a locus in 5AL also affected the compact spike  
253 phenotype (Mitrofanova, 1997; Laikova *et al.*, 2009; Kosuge *et al.*, 2008, 2012). Further,  
254 it was hypothesized that the genomic region affecting spike density flanked the *Q* locus  
255 (Kosuge *et al.*, 2012). Simons *et al.* (2006) reported that a transgene of *Q* in bread wheat  
256 could occasionally lead to compact spikes. Our research illustrated that the *Q* gene with  
257 point mutations in the miR172-binding region determined the spike density of wheat.

258 For miRNA-directed cleavage, base-pairing between miRNAs and their target  
259 mRNAs is critical (Huntzinger and Izaurralde, 2011). The point mutations in the  
260 miRNA-binding region of the *Q* gene interfered with the regulation of miR172 and thus  
261 led to an increased spike density and decreased plant height. *Q* was one of the most  
262 important genes during the domestication of bread wheat. A single point mutation in the  
263 10th exon of *q* results in the emergence of *Q*, which caused desired changes in wheat,

264 including the loss of glume and rachis fragility (Simons *et al.*, 2006). The point mutation  
265 in *q* did not result in an amino acid difference. This indicates that the compact spike  
266 phenotype is mainly determined by the disturbance in the cleavage of miR172 rather than  
267 a protein sequence change.

268 miR172 mainly regulates its target mRNAs by translational inhibition and/or  
269 transcript cleavage in Arabidopsis (Chen, 2004). However, the expressional difference at  
270 the RNA level was easily observed (Figure 3) when comparing *S-Cpl-1* and WT. To  
271 determine whether there was any difference at the protein level, isobaric tags for relative  
272 and absolute quantification (iTRAQ) and mass spectrophotometry were carried out.  
273 Unfortunately, the Q protein was not detected by these two methods, possibly because of  
274 the special structure of Q and the limitations of the techniques.

275 Plant height is an important agronomic trait for plant architecture and grain yield in  
276 wheat. *Reduced-height 1 (Rht1)*, which gave rise to the “green revolution”, and other *Rht*  
277 genes have been used successfully in wheat breeding (Peng *et al.*, 1999; Pearce *et al.*,  
278 2011; Chen *et al.*, 2014). Most *Rht* genes control the dwarf phenotype by regulating  
279 endogenous phytohormones (Hong *et al.*, 2003; Tanabe *et al.*, 2005). Additionally, the  
280 phenylpropanoid pathway is involved in the dwarf phenotype (Schoor *et al.*, 2011). The  
281 silencing of the *cinnamyl alcohol dehydrogenase* gene could lead to a dwarf phenotype  
282 with a reduced lignin content (Trabucco *et al.*, 2013). Because of the reduced lignin  
283 content in the culm of *S-Cpl-1* compared with WT (data not shown), we speculated that  
284 the phenylpropanoid pathway in *S-Cpl-1* was affected by the higher expression of *Q<sup>cl</sup>* in  
285 the stem, which resulted in the decreased plant height in the mutant.

286 The improvement in the wheat processing quality has been extensively studied over  
287 the years. Grain protein content is a crucial index for measuring wheat quality (Weegels  
288 *et al.*, 1996). *S-Cp1-1* had a higher grain protein content than WT, suggesting a key role  
289 of  $Q^{c1}$  in regulating the accumulation of seed storage proteins in wheat. A transcriptome  
290 analysis (unpublished data) showed that the expression of the *storage protein activator*  
291 gene in *S-Cp1-1* increased by 7-fold, compared with WT. Therefore, we suspected that  
292 the overexpression of  $Q$  promoted the expression of the gene and subsequently enhanced  
293 the biosynthesis of seed storage proteins (Ravel *et al.*, 2009). The significant change in  
294 the processing quality in common wheat mutants with different  $Q^c$  alleles indicated that  
295  $Q^c$  can be used in quality breeding.

296

#### 297 **Accession Numbers**

298 Nucleotide sequence data from this article can be found in the GenBank/EMBL databases  
299 under the following accession numbers: KX580301-KX580304 and  
300 KX620761-KX620768.

301

#### 302 **Author contributions**

303 P.F.Q. and Y.L.Z. designed the experiments. P.F.Q., B.J.X., Q.C., Z.T., Y.M.W., J.R.W.,  
304 Q.T.J., X.J.L., J.M. and Y.L.Z. analyzed the data. P.F.Q. and Q.C. prepared the plant  
305 materials. P.F.Q., B.J.X. and Q.C. wrote the manuscript. P.F.Q., B.J.X., Y.Z.Z., Y.L.Z. and  
306 Y.M.W. prepared the figures. P.F.Q., B.J.X., Q.C., T.Z., Y.F.J., Y.Y.Q., Z.R.G., Y.L.C.,  
307 Y.W., Y.Z.Z., L.J.Z. J.Z. and C.H.L. performed the experiments. J.R.W., Q.T.J., X.J.L.  
308 and J.M. provided key advice.

309

310 **Acknowledgements**

311 This research was supported by the National Natural Science Foundation of China  
312 (31230053, 31570335 and 31671677), and the National Basic Research Program of  
313 China (2014CB147200). We thank Dr. Hong-Yang Yu, Dr. Jing Fan and Prof. Wen-Ming  
314 Wang at Sichuan Agricultural University for their technical assistance.

315 **References**

- 316 AACC., 2001 Sedimentation test for wheat. Approved Methods of the American  
317 Association of Cereal Chemists (Method 56-61), 10th ed. AACC, St. Paul, MN, USA
- 318 AACC., 2010 Basic Straight-Dough Bread-baking Method. Approved Methods of the  
319 American Association of Cereal Chemists (Method 10.09-01), St. Paul, MN, USA
- 320 Chen, L., L. Hao., A. G. Condon, and Y. G. Yu, 2014 Exogenous GA3 application can  
321 compensate the morphogenetic effects of the GA-responsive dwarfing gene *Rht12* in  
322 bread wheat. Plos One 9: e86431.
- 323 Chen, X., 2004 A microRNA as a translational repressor of *APETALA2* in *Arabidopsis*  
324 flower development. Science 303: 2022-2025.
- 325 Dvorak, J., M. C. Luo, Z.L. Yang, and H.B. Zhang, 1998 The structure of the *Aegilops*  
326 *tauschii* genepool and the evolution of hexaploid wheat. Theor. Appl. Genet. 97: 657-670.
- 327 Druka, A., J. Franckowiak, U. Lundqvist, N. Bonar, J. Alexander *et al.*, 2011 Genetic  
328 dissection of barley morphology and development. Plant Physiol. 155: 617-627.
- 329 Faris, J. D., J. P. Fellers, S. A. Brooks, and B. S. Gill, 2003 A bacterial artificial  
330 chromosome contig spanning the major domestication locus *Q* in wheat and identification  
331 of a candidate gene. Genetics 164: 311-321.
- 332 Faris, J. D., Z. Zhang, J. P. Fellers, and B. S. Gill, 2008 Micro-colinearity between rice,  
333 *Brachypodium*, and *Triticum monococcum* at the wheat domestication locus *Q*. Funct.  
334 Integr. Genomics 8: 149-164.
- 335 Gil-Humanes, J., F. Pistón, A. Martín, and F. Barro, 2009 Comparative genomic analysis  
336 and expression of the *APETALA2-like* genes from barley, wheat, and barley-wheat  
337 amphiploids. BMC Plant Biol. 9: 66.



- 338 Hong, Z., M. Ueguchi-Tanaka, K. Umemura, S. Uozu, S. Fujioka, 2003 A rice  
339 brassinosteroid-defective mutant, *ebisu dwarf* (*d2*), is caused by a loss of function of a  
340 new member of cytochrome P450. *Plant Cell* 17: 776-790.
- 341 Huntzinger, E., and E. Izaurralde, 2011 Gene silencing by microRNAs: contributions of  
342 translational repression and mRNA decay. *Nat. Rev. Genet.* 12: 99-110.
- 343 Ji, L., T. Barrett, O. Ayanbule, D. B. Troup, D. Rudnev, 2010 NCBI Peptidome: a new  
344 repository for mass spectrometry proteomics data. *Nucleic Acids. Res.* 38: D731-D735.
- 345 Johnson, E. R., V. J. Nalam, R. S. Zemetra, and O. Riera-Lizarazu, 2008 Mapping the  
346 compactum locus in wheat (*Triticum aestivum* L.) and its relationship to other spike  
347 morphology genes of the *Triticeae*. *Euphytica* 163: 193-201.
- 348 Kosuge, K., N. Watanabe, T. Kuboyama, V. M. Melnik, V. I. Yanchenko, 2008  
349 Cytological and microsatellite mapping of mutant genes for spherical grain and compact  
350 spikes in durum wheat. *Euphytica* 159: 289-296.
- 351 Kosuge, K., N. Watanabe, V. M. Melnik, L. I. Laikova, and N. P. Goncharov, 2012 New  
352 sources of compact spike morphology determined by the genes on the chromosome 5A in  
353 hexaploid wheat. *Genet. Resour. Crop Evol.* 59: 1115-1124.
- 354 Laikova, L. I., N. P. Goncharov, O. P. Popova, V. M. Melnik, O. P. Mitrofanova, and N.  
355 Watanabe, 2009 Genetic studies of bread wheat mutants. *Bull. Appl. Bot. Genet. Breed*  
356 166: 396-399.
- 357 Ling, H. Q., S. Zhao, D. Liu, J. Wang, H. Sun, *et al.*, 2013 Draft genome of the wheat  
358 A-genome progenitor *Triticum urartu*. *Nature* 496: 87-90.
- 359 Llave, C., Z. Xie, , K. D. Kasschau, and J. C. Carrington, 2002 Cleavage of  
360 Scarecrow-like mRNA targets directed by a class of *Arabidopsis* miRNA. *Science* 297:

- 361 2053-2056.
- 362 Mitrofanova, O. P., 1997 The inheritance and effect of *Cp* (Compact plant) mutation  
363 induced in common wheat. *Genetika* 33: 482-488.
- 364 Pearce, S., R. Saville, S. P. Vaughan, P. M. Chandler, E. P. Wilhelm, *et al.*, 2011  
365 Molecular characterization of *Rht-1* dwarfing genes in hexaploid wheat. *Plant Physiol.*  
366 157: 1820-1831.
- 367 Peng, J., D. E. Richards, N. M., Hartley, G. P. Murphy, K.M. Devos, *et al.*, 1999 “Green  
368 revolution” genes encodes mutant gibberellin response modulators. *Nature* 400: 256-261.
- 369 Qi, P. F., Y. M. Wei, Q. Chen, T. Quellet, J. Ai, G. Y. Chen, W. Li, Y. L. Zheng, 2011  
370 Identification of novel  $\alpha$ -gliadin genes. *Genome* 54: 244-252.
- 371 Ravel, C., P. Martre, I. Romeuf, M. Dardevet, R. El-Malki, *et al.*, 2009 Nucleotide  
372 polymorphism in the wheat transcriptional activator *Spa* influences its pattern of  
373 expression and has pleiotropic effects on grain protein composition, dough viscoelasticity,  
374 and grain hardness. *Plant Physiol.* 151: 2133-2144.
- 375 Schoor, S., S. Farrow, H. Blaschke, S. Lee, G. Perry, *et al.*, 2011 Adenosine kinase  
376 contributes to cytokinin interconversion in *Arabidopsis*. *Plant Physiol.* 157: 659-672.
- 377 Schwab, R., J. F. Palatnik, M. Riester, C. Schommer, M. Schmid, *et al.*, 2005 Specific  
378 effects of microRNAs on the plant transcriptome. *Dev. Cell* 8: 517-527.
- 379 Shewry, P. R., N. G. Halford, A. S. Tatham, Y. Popineau, D. Lafiandra, *et al.*, 2003 The  
380 high molecular weight subunits of wheat glutenin and their role in determining wheat  
381 processing properties. *Adv. Food Nutr. Res.* 45: 219-302.
- 382 Simons, K. J., J. P. Fellers, H. N. Trick, Z. Zhang, Y. Tai, *et al.*, 2006 Molecular  
383 characterization of the major wheat domestication gene *Q*. *Genetics* 172: 547-555.

- 384 Sood, S., V. Kuraparthi, G. Bai, , B. S. Gill, 2009 The major threshability genes soft  
385 glume (*sog*) and tenacious glume (*Tg*), of diploid and polyploid wheat, trace their origin  
386 to independent mutations at non-orthologous loci. *Theor. Appl. Genet.* 119: 341-351.
- 387 Tang, Q. Y., and C. X. Zhang, 2013 Data Processing System (DPS) software with  
388 experimental design, statistical analysis and data mining developed for use in  
389 entomological research. *Insect Sci.* 20: 254-260.
- 390 Tanabe, S., M. Ashikari, S. Fujioka, S. Takatsuto, S. Yoshida, *et al.*, 2005 A novel  
391 cytochrome P450 is implicated in brassinosteroid biosynthesis via the characterization of  
392 a rice dwarf mutant, *dwarf11*, with reduced seed length. *Plant Cell* 17: 776-790.
- 393 Trabucco, G. M., D. A. Matos, S. J. Lee, A. J. Saathoff, H. D. Priest, *et al.*, 2013  
394 Functional characterization of cinnamyl alcohol dehydrogenase and caffeic acid  
395 O-methyltransferase in *Brachypodium distachyon*. *BMC Biotechnol.* 13: 61.
- 396 Wang, S., D. Wong, K. Forrest, A. Allen, S. Chao, *et al.*, 2014 Characterization of  
397 polyploid wheat genomic diversity using a high-density 90, 000 single nucleotide  
398 polymorphism array. *Plant Biotechnol. J.* 12: 787-796.
- 399 Weegels, P. L., R. J. Hamer, and J. D. Schofield, 1996 Critical review: functional  
400 properties of wheat glutenin. *J. Cereal Sci.* 23: 1-18.
- 401 Yan, L., A. Loukoianov, G. Tranquilli, M. Helquera, T. Fahima, *et al.*, 2003 Positional  
402 cloning of the wheat vernalization gene of *VRN1*. *Proc. Natl. Acad. Sci., USA* 100:  
403 6253-6268.
- 404 Zhang, Z., H. Beclan, P. Gornicki, M. Charlesb, J. Justb, *et al.*, 2011 Duplication and  
405 partitioning in evolution and function of homoeologous *Q* loci governing domestication  
406 characters in polyploid wheat. *Proc. Natl. Acad. Sci., USA* 108: 18737-18742.

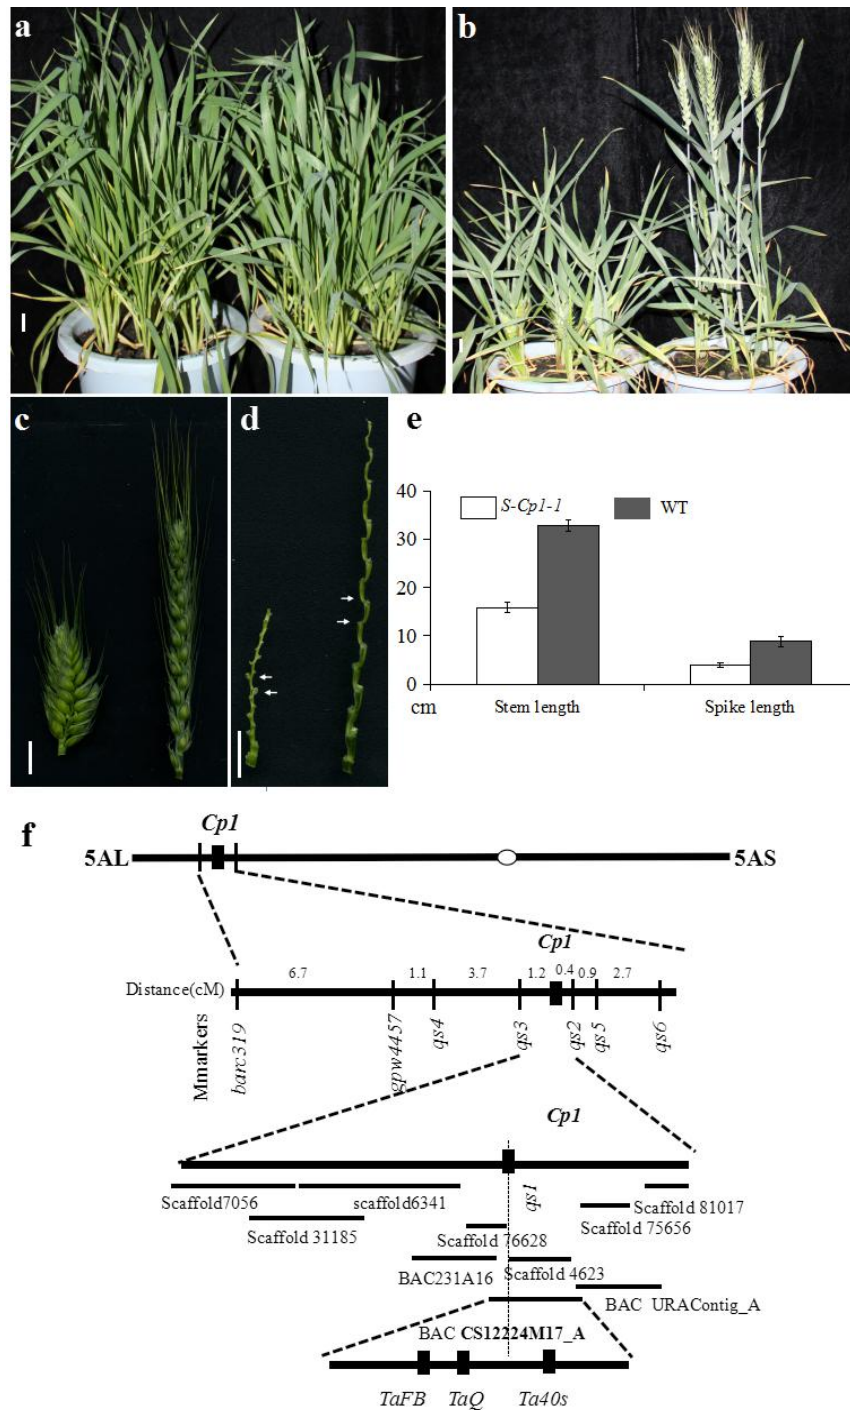

407

408 **Figure 1** Phenotype of the *S-Cpl-1* mutant and mapping of the *cpl* locus. (A) *S-Cpl-1*  
 409 (left) and WT (right) plants at the tillering stage. (B) *S-Cpl-1* mutant (left) and WT (right)  
 410 plants at the heading stage. (C) Spikes of *S-Cpl-1* (left) and WT (right) at the heading  
 411 stage. (D) Rachises of *S-Cpl-1* (left) and WT (right). The rachis between the white  
 412 arrows indicates the tissues used in Fig. 2. (E) Stem lengths and spike lengths of *S-Cpl-1*  
 413 and WT at the maturity stage. Data are means  $\pm$  s.d. (standard deviation; n = 35). (F)  
 414 Mapping of the *cpl* locus. Scale bar, 1 cm.



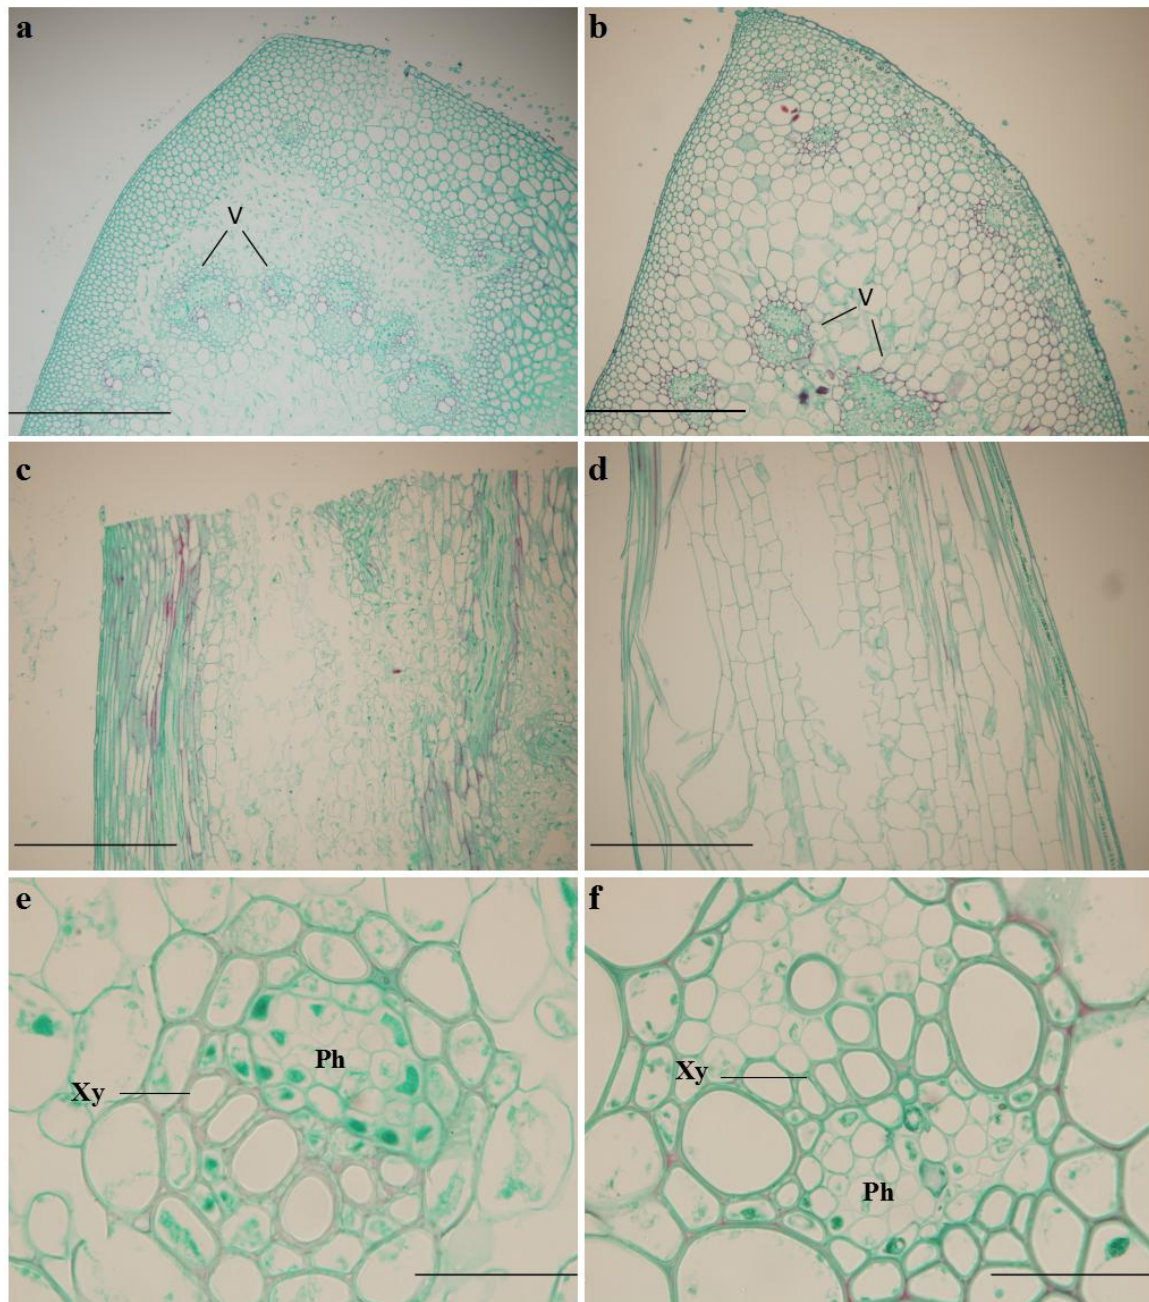

415

416 **Figure 2** The contrasting cell morphology of the rachises of *S-Cp1-1* and WT. (A)–(B)

417 The transverse sections of *S-Cp1-1* (A) and WT (B). (C)–(D) The longitudinal sections of

418 *S-Cp1-1* (C) and WT (D). (E)–(F) The cells in the vascular bundles of *S-Cp1-1* (E) and WT

419 (F). V, vascular bundles; Ph, phloem; Xy, xylem. Scale bar, 10  $\mu\text{m}$  in a–d and 0.1  $\mu\text{m}$  in E

420 and F.

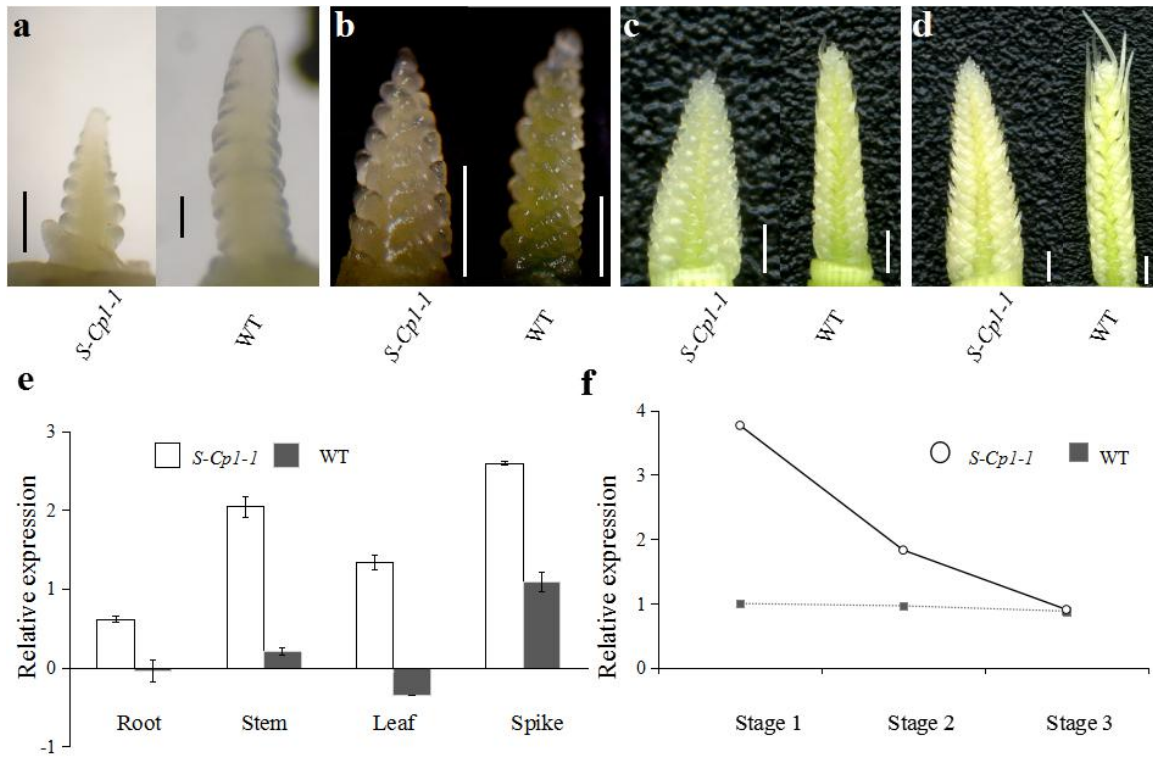

421

422 **Figure 3** Expressional pattern of  $Q^{cl}$ . (A)–(D) The developing spikes of  $S-Cp1-1$  (left)  
423 and WT (right) at the glume differentiation stage, the pistil and stamen initiation stage,  
424 the anther formation stage and the anther elongation stage, respectively. (E) Relative  
425 expression levels of  $Q^{cl}$  and  $Q$  in roots, stems, leaves and spikes at the pistil and stamen  
426 initiation stage. (F) Relative expression of  $Q^{cl}$  and  $Q$  at the pistil and stamen initiation  
427 stage (stage 1), the anther formation stage (stage 2) and the anther elongation stage (stage  
428 3). Error bars represent means  $\pm$  s.d. (n = 3).

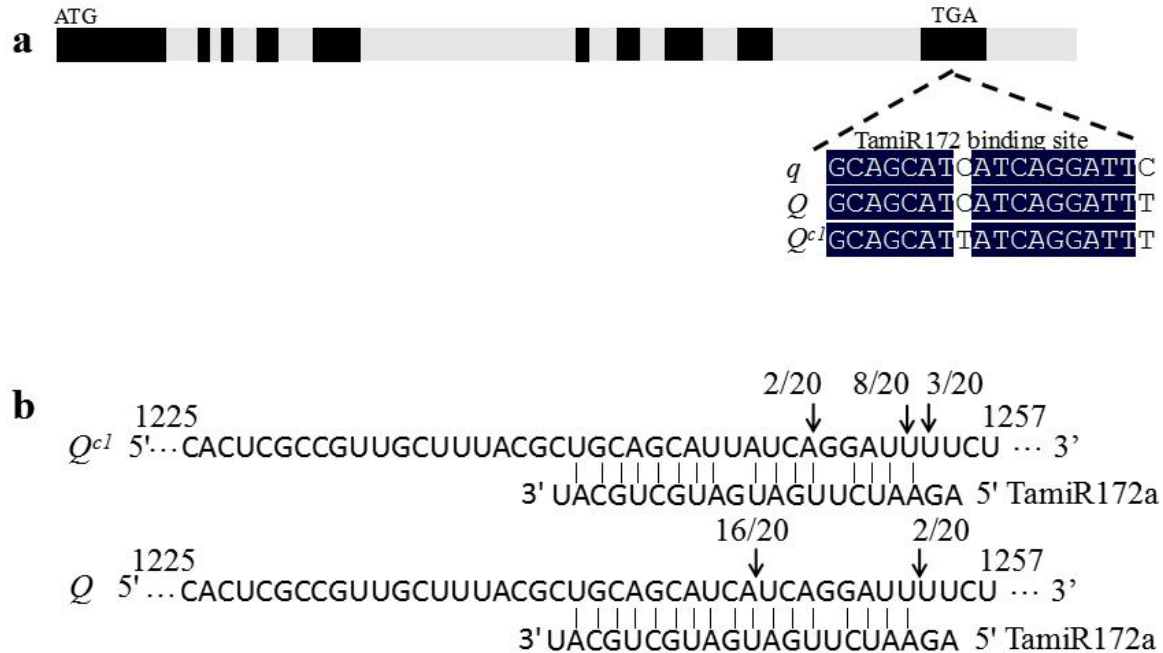

429

430 **Figure 4** Genomic structure of the *Q<sup>cl</sup>* gene and confirmation of miR172-directed  
 431 regulation of *Q<sup>cl</sup>*. (A) Genomic structure of the *Q<sup>cl</sup>* gene. The initiation and termination  
 432 codons, exons (black rectangles) and introns (grey rectangles) are illustrated. The  
 433 positions of mutations in the miR172-binding region of *q*, *Q* and *Q<sup>cl</sup>* are indicated. (B)  
 434 miR172 cleavage sites in the mRNAs of *Q<sup>cl</sup>* and *Q* as determined by RNA  
 435 ligase-mediated 5' RACE.

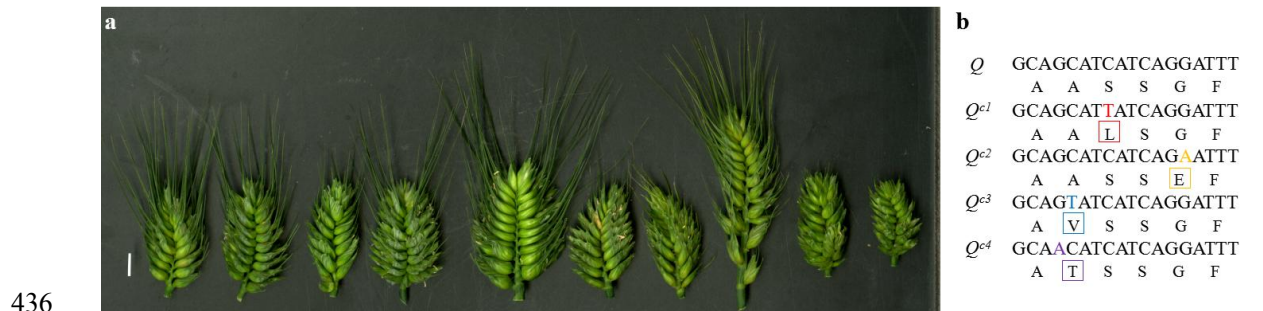



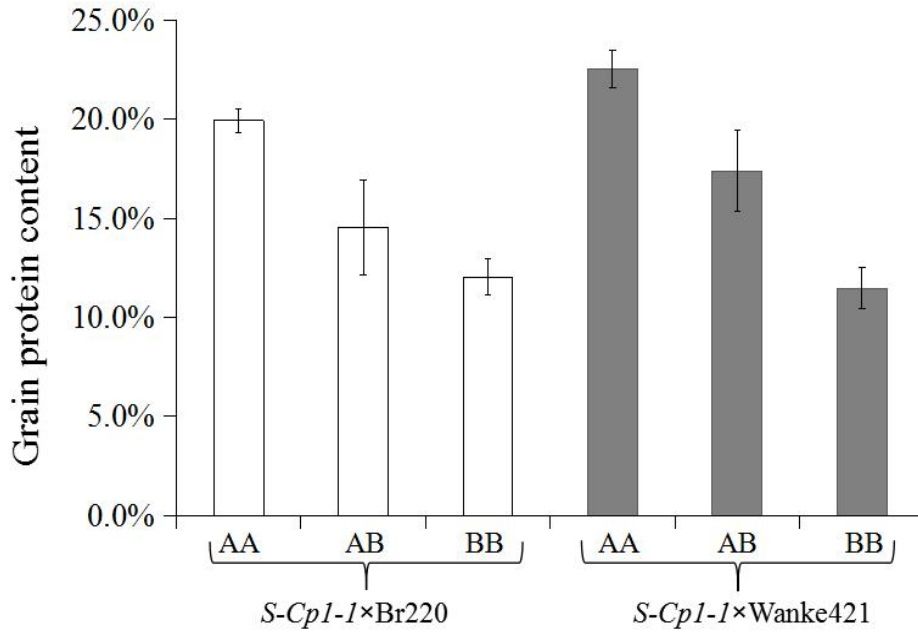

441

442 **Figure 6** Grain protein contents of seeds harvested from individual plants in two F<sub>2</sub>

443 populations. Data are means ± s.d. (n = 20). The different small letters above each box

444 indicate significance at P < 0.05.

445

446 **Table 1** Effect of  $Q^c$  on wheat processing quality parameters.

| Genotype        | Grain protein content | Wet gluten  | Sedimentation | Development |
|-----------------|-----------------------|-------------|---------------|-------------|
|                 | (%; dry weight)       | content (%) | value (mL)    | time (min)  |
| $Q^{c1}/Q^{c1}$ | 19.73a                | 50.60a      | 63.05a        | 7.23a       |
| $Q^{c1}/Q$      | 16.20b                | 39.63b      | 50.52b        | 5.42b       |
| $Q/Q$           | 14.00c                | 34.83c      | 36.83c        | 3.55c       |

447 Different letters represent significance at  $P < 0.05$ . Significance was calculated using  
448 Student's  $t$ -test (DPS software version 12.01; Tang & Zhang 2013). The WT ( $QQ$ ),  
449 heterozygous ( $QQ^c$ ) and mutant ( $Q^cQ^c$ ) lines used were derived from an  $M_6$  heterozygous  
450 plant.

451 **Supplemental files**

452 **Figure S1** Phenotypes of  $Q^{cl}/Q^{cl}$ ,  $Q^{cl}/Q$ ,  $Q/Q$  in the common wheat cultivar ‘Shumai482’  
453 background. The spike density and plant height of the heterozygote were intermediate  
454 values.

455 **Figure S2** Mapping of the *cp1* locus using SNP markers. Dots indicate the markers. The  
456 ordinate represents the square of the correlation coefficient.

457 **Figure S3** Alignment of the amino acid sequences of the  $Q$  and  $Q^c$  alleles. The conserved  
458 domains are indicated (Gil-Humanes *et al.*, 2009).

459 **Figure S4** Effects of  $Q^{cl}$  on loaf volume.

460 **Figure S5** Separation of seed storage proteins by SDS-PAGE. HMW-GS, high molecular  
461 weight glutenin subunit; LMW-GS, low molecular weight glutenin subunit; Ax1, Dx5,  
462 Bx7, By9 and Dy10 indicate the composition of HMW-GS in the wheat cultivar  
463 “Shumai482”.

464 **Table S1** The effects of four  $Q^c$  alleles on the grain protein content (dry weight).

465 **Table S2** Primers used in this study.

466 **Table S3** Scaffolds and BACs used in this study.
